# Supplementary material
Source: PubMed Central journal article supplement (PMC5192135)
Supplement: AAC.01162-16_zac001175793s1.pdf [file AAC.01162-16_zac001175793s1.pdf]

Supplementary Figures/Tables

Supplementary Figure S1

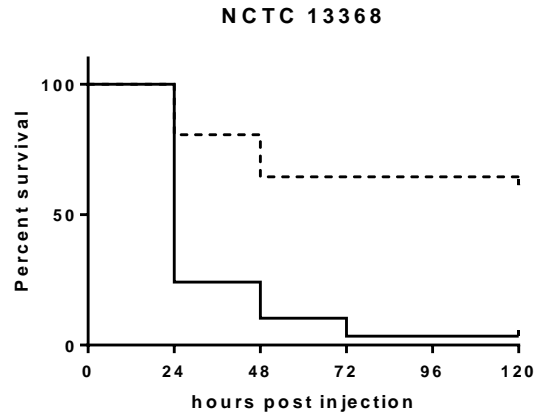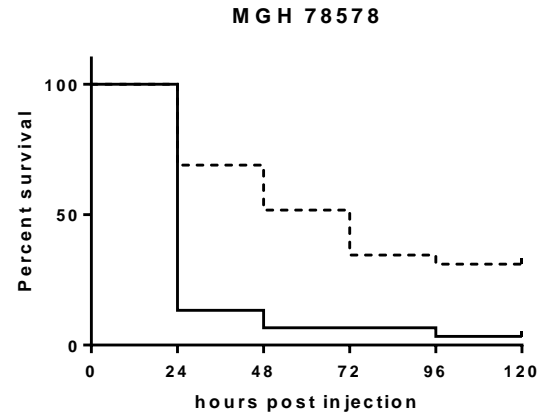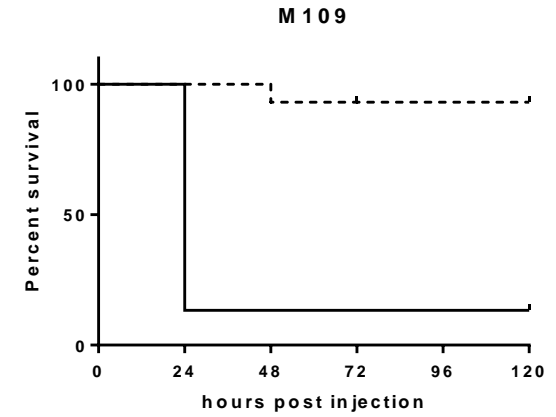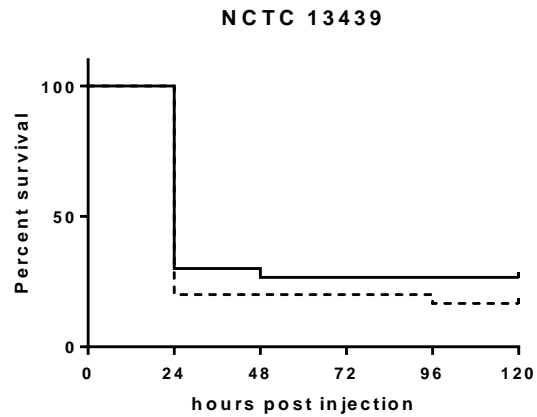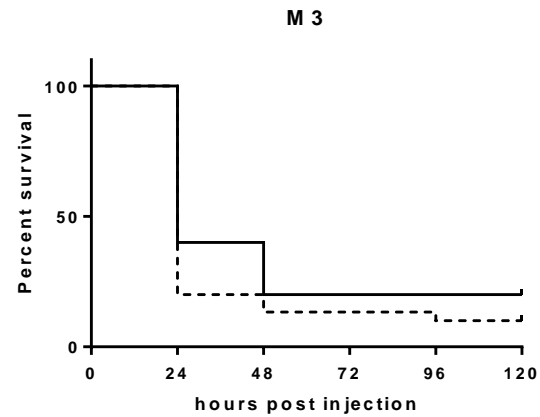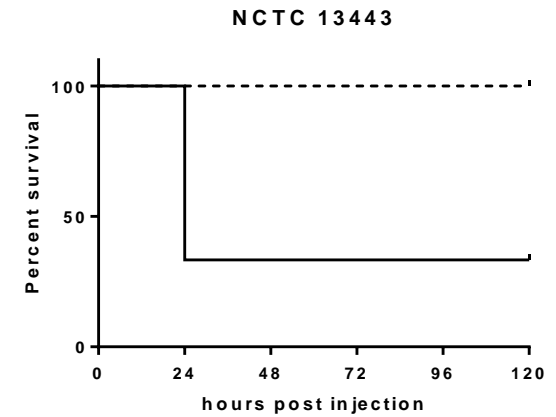

**Figure S1. Virulence of *K. pneumoniae* strains in *Galleria* after adaptation to chlorhexidine.** Groups of 30 larvae were challenged with  $1 \times 10^6$  (NCTC 13443, MGH 78578);  $1 \times 10^5$  (M109);  $1 \times 10^4$  (NCTC 13368);  $1 \times 10^3$  (M3, NCTC 13439) cfu. The number of alive vs. dead larvae was determined every 24 h post infection up to 120 h. Wild-type (Solid line) and chlorhexidine adapted (dashed line) are shown. Results were analysed using the Mantel-Cox method and highly significant differences in survival ( $P < 0.0001$ ) were found for NCTC 13443, MGH 78578, M109 and NCTC 13368. No significant difference was found for M3 and NCTC 13439 ( $P > 0.05$ ).

**Table S1: Primers used in study**

| Gene                    | Primer name        | F/R | Sequence (5'→3')            | comment                      |
|-------------------------|--------------------|-----|-----------------------------|------------------------------|
| qPCR Primers            |                    |     |                             |                              |
| <i>rpoB</i>             | LBOL064            | F   | AAATCACCCAAGGCGACGAT        |                              |
|                         | LBOL065            | R   | ACCCTTGTTACCGTGACGAC        |                              |
| <i>gapA</i>             | LBOL066            | F   | GATGGCCCGTCTCACAAAGA        |                              |
|                         | LBOL067            | R   | ATACCGGTCAGTTTGCCGTT        |                              |
| <i>infB</i>             | LBOL090            | F   | TTCTTCAAGTTTGCGGCGTG        |                              |
|                         | LBOL091            | R   | CCCAGGCTGAAAAGATCCGT        |                              |
| <i>phoP</i>             | LBOL104            |     |                             | For all strains except M3 CA |
|                         |                    | F   | GCGAAGGATGGCAGGATAAAG       |                              |
|                         | LBOL105<br>LBOL176 | R   | GCGGCAACCTCTTCAATATG        | Replaces LBOL104 in M3 CA    |
| <i>phoQ</i>             | LBOL082            | F   | GCAAAGGATGGCAGGATAAAG       |                              |
|                         | LBOL083            | R   | GCACGGAAACTTCCACGAAC        |                              |
| <i>smvA</i>             | LBOL162            | F   | GATCACTTTTGTGCGGCGAGC       |                              |
|                         | LBOL163            | R   | CGCTGATGGCGATTTTGCTG        |                              |
| <i>smvR</i>             | LBOL062            | F   | CGCTGAGGGTTCGGCG            |                              |
|                         | LBOL063            | R   | ATGATCGGCAGCGAGGATG         |                              |
| <i>pmrK</i>             | LBOL174            | F   | AGGTAGGCCGCTTTGATGTC        |                              |
|                         | LBOL175            | R   | CACCGCGATGCTGGTGT           |                              |
| <i>pmrD</i>             | LBOL068            |     |                             | For all strains except 13368 |
|                         |                    | F   | TGCTTCAGAGCGGTGCG           |                              |
|                         | LBOL069<br>LBOL108 | R   | GCATCGGCCAGCGGAG            | Replaces LBOL068 in 13368    |
| <i>pagP</i>             |                    | F   | CGTGCTTCAGAGCGGTACA         |                              |
|                         | LBOL109            | R   | CGTGCTTCAGAGCGGTACA         |                              |
|                         | LBOL120            |     |                             | For all strains except 13368 |
|                         |                    | R   | CCGCTGACGGACCAGAATTT        |                              |
|                         | LBOL121            | F   | GCCGGACCGTAACCTATTGA        |                              |
|                         | LBOL122            |     |                             | Replaces LBOL120 in 13368    |
|                         |                    | R   | CCGCTGACGGATCAGAACTT        |                              |
| Plasmid complementation |                    |     |                             |                              |
| <i>phoPQ</i>            | KPPhoProm          |     |                             |                              |
|                         | F ClaI             | F   | CTGAATCGATAATGGATAACCTGCG   |                              |
| <i>phoPQ</i>            | KPPhoQ R           |     |                             |                              |
|                         | XbaI               | R   | GCCGTCTAGATTAACCTCTGTTTATC  |                              |
| <i>smvR</i>             | K.p. cRP F         |     |                             |                              |
|                         | ClaI               | F   | CTTAATCGATGCTTAAAGCCGAT     |                              |
| <i>smvR</i>             | K.p. cRP R         |     |                             |                              |
|                         | XbaI               | R   | CGGATCTAGACCTAAAACAACCTCCAG |                              |

**Table S2. MICs of additional antibiotics for chlorhexidine-adapted strains.** Antibiotics used were amikacin (AMK), ceftazidime (CAZ), ciprofloxacin (CIP), meropenem (MEM), chloramphenicol (CHL) and piperacillin/tazobactam (TZP). All values are given in mg/L. All MICs are shown as the range from at least three independent experiments.

|               | AMK     | CAZ              | CIP                   | MEM              | CHL             | TZP   |
|---------------|---------|------------------|-----------------------|------------------|-----------------|-------|
| M109 WT       | 4-8     | ≤0.5             | 0.06-0.125            | 0.06-0.125       | 8               | 4     |
| M109 CA       | 4       | ≤0.5             | 0.06-0.125            | ≤0.06            | 4-8             | 2-4   |
| NCTC 13439 WT | 4-8     | >512             | 4-8                   | 16-32            | 16-32           | 512   |
| NCTC 13439 CA | 4-8     | 512->512         | 0.25-0.5 <sup>a</sup> | 16-32            | 16              | 512   |
| M3 WT         | 128-256 | 256              | 0.25-0.5              | 0.06-0.125       | 4               | 64    |
| M3 CA         | 64-128  | 256-512          | 0.25-0.5              | 0.06-0.25        | 4               | 16-32 |
| NCTC 13443 WT | >512    | >512             | >64                   | 64->64           | >512            | >512  |
| NCTC 13443 CA | >512    | >512             | >64                   | 1-2 <sup>a</sup> | 64 <sup>a</sup> | >512  |
| NCTC 13368 WT | 4-8     | 256              | 0.25-0.5              | 0.125-0.25       | 32              | 16    |
| NCTC 13368 CA | 4-8     | 256              | 0.5-1                 | 0.25-0.5         | 32              | 16    |
| MGH 78578 WT  | 64      | 512->512         | 1                     | 0.06-0.125       | >512            | 16    |
| MGH 78578 CA  | 128-256 | 1-2 <sup>a</sup> | 4-8 <sup>a</sup>      | 0.06-0.125       | >512            | 16    |

<sup>a</sup> ≥ 4-fold increase or decrease in MIC for chlorhexidine-adapted strains (CA) relative to non-adapted strains (WT)

**Table S3 – List of additional chromosomal genetic changes after exposure to chlorhexidine and repeated passage**

| Strain and gene name<br>(if known) | Type of Change                       | Change                                     | MGH 78578 equivalent<br>based on (NC_009648.1) | Function                                               |
|------------------------------------|--------------------------------------|--------------------------------------------|------------------------------------------------|--------------------------------------------------------|
| <b>NCTC 13439</b>                  |                                      |                                            |                                                |                                                        |
|                                    | SNP                                  | In promoter                                | KPN_RS14630                                    | Lipoprotein involved in maintaining OM lipid asymmetry |
| <b>M3</b>                          |                                      |                                            |                                                |                                                        |
|                                    | SNP (synonymous)                     |                                            | KPN_RS21100                                    | lipase                                                 |
|                                    | SNP                                  | In promoter                                | KPN_RS13675                                    | D-arabinitol 4-dehydrogenase                           |
| <b>NCTC 13368</b>                  |                                      |                                            |                                                |                                                        |
|                                    | SNP                                  | E404V                                      | KPN_RS22260                                    | Porin protein                                          |
|                                    | Deletion (C) after<br>nucleotide 150 | Truncation of 52<br>aa, normally 181<br>aa | KPN_RS25745                                    | Porin                                                  |
| <b>MGH 78578</b>                   |                                      |                                            |                                                |                                                        |
|                                    | SNP (synonymous)                     |                                            | KPN_RS04285                                    | Urocanate hydratase                                    |
|                                    | SNP (synonymous)                     |                                            | KPN_RS04265                                    | Acyl-CoA thioesterase                                  |
|                                    | SNP                                  | I11F                                       | KPN_RS02945                                    | DNA-binding protein                                    |
|                                    | SNP (synonymous)                     |                                            | KPN_RS19805                                    | Hypothetical protein                                   |
|                                    | SNP                                  | G9C                                        | KPN_RS02085                                    | Cytochrome C oxidase subunit III                       |
|                                    | SNP                                  | R547H                                      | KPN_RS02165                                    | Hypothetical protein                                   |
|                                    | SNP                                  | A265T                                      | KPN_RS03145                                    | ABC transporter substrate-binding protein              |
| <i>asnB</i>                        | SNP (synonymous)                     |                                            | KPN_RS03730                                    | Asparagine synthetase B                                |
|                                    | SNP                                  | D174G                                      | KPN_RS03925                                    | Succinate dehydrogenase flavoprotein subunit           |
| <i>sdhA</i>                        | SNP                                  | Y287C                                      | KPN_RS13300                                    | Membrane protein                                       |
|                                    | SNP (synonymous)                     |                                            | KPN_RS13185                                    | MATE family multidrug exporter                         |
|                                    | SNP (synonymous)                     |                                            | KPN_RS13070                                    | Membrane protein                                       |
|                                    | SNP (synonymous)                     |                                            | KPN_RS13040                                    | Alpha-amylase                                          |
| <i>tyrP</i>                        | SNP                                  | V142A                                      | KPN_RS12965                                    | Tyrosine transporter                                   |
|                                    | SNP (synonymous)                     |                                            | KPN_RS12455                                    | SpoVR family protein                                   |

|             |                  |                                            |                     |                                                                |
|-------------|------------------|--------------------------------------------|---------------------|----------------------------------------------------------------|
|             | SNP              | A284V                                      | KPN_RS12365         | Threonine dehydratase                                          |
|             | SNP              |                                            | Prom of KPN_RS12070 | Transporter                                                    |
|             | SNP              | T143A                                      | KPN_RS11985         | Nitrate ABC transporter substrate-binding protein              |
|             | In (C)           | Truncation of<br>282aa (normally<br>460aa) | KPN_RS11960         | Invasin                                                        |
| <i>narZ</i> | SNP (synonymous) |                                            | KPN_RS11935         | Nitrate reductase A subunit alpha                              |
|             | SNP              | Q337R                                      | KPN_RS11025         | MFS transporter                                                |
|             | SNP (synonymous) |                                            | KPN_RS10495         | LysR family transcriptional regulator                          |
|             | SNP              | G97V                                       | KPN_RS09770         | Coenzyme PQQ synthesis protein E                               |
|             | SNP              | A12V                                       | KPN_RS09680         | Hypothetical protein                                           |
| <i>nlpI</i> | SNP              | G272N                                      | KPN_RS18270         | Cystathionine beta-synthase                                    |
|             | SNP              |                                            | Prom of KPN_RS19345 | Lipoprotein                                                    |
|             | Del (C)          | Truncation of<br>163aa (normally<br>303aa) | KPN_RS18280         | LysR family transcriptional regulator                          |
| <i>cysJ</i> | SNP              | M177V                                      | KPN_RS16795         | Hypothetical protein                                           |
|             | SNP              | Q529R                                      | KPN_RS16705         | Sulfite reductase subunit alpha                                |
|             | SNP              | E129G                                      | KPN_RS16695         | Phosphoadenosine phosphosulfate reductase                      |
|             | SNP              | Y79C                                       | KPN_RS16115         | Ribonucleoside-diphosphate reductase class 1b<br>subunit alpha |
| <i>raiA</i> | SNP              | V66A                                       | KPN_RS15940         | Xylose isomerase                                               |
|             | SNP              | D51N                                       | KPN_RS15660         | Translation inhibitor protein                                  |
|             | SNP              | V512A                                      | KPN_RS25295         | 2-oxoglutarate dehydrogenase E2                                |
|             | SNP              | STOP51W<br>(causes extra 8 aa)             | KPN_RS00370         | Hypothetical protein                                           |
|             | SNP              |                                            | Prom of KPN_RS00865 | Hypothetical protein                                           |
|             | SNP              | D19G                                       | KPN_RS01005         | 1-deoxy-D-xylulose 5-phosphate reductoisomerase                |
| <i>pvcC</i> | SNP              | D253N                                      | KPN_RS25780         | Pyoverdin chromophore biosynthetic protein                     |
|             | SNP              | D202G                                      | KPN_RS26100         | Thymidine phosphorylase                                        |
|             | SNP              | Y39C                                       | KPN_RS00035         | Sodium:alanine symporter                                       |

|                  |                               |             |                                     |                                                   |
|------------------|-------------------------------|-------------|-------------------------------------|---------------------------------------------------|
| <i>tynA</i>      | SNP                           | V397A       | KPN_RS07870                         | Tyramine oxidase                                  |
|                  | SNP (synonymous)              |             | KPN_RS08215                         | Cysteine methyltransferase                        |
|                  | SNP                           | V488A       | KPN_RS13970                         | PTS fructose transporter subunit IIBC             |
|                  | SNP                           | V62A        | KPN_RS14240                         | L-rhamnonate dehydratase                          |
|                  | SNP                           | -           | Prom of KPN_RS14630                 | Lipoprotein                                       |
|                  | SNP                           | R80C        | KPN_RS06285                         | Hypothetical protein                              |
|                  | SNP                           | D177G       | KPN_RS06590                         | PTS N'-diacetylchitobiose transporter subunit IIC |
|                  | SNP                           | V198A       | KPN_RS06930                         | Peptide ABC transporter permease                  |
|                  | SNP                           | -           | Between KPN_RS17355 and KPN_RS17350 |                                                   |
|                  | SNP (synonymous)              | -           | KPN_RS17280                         | GHMP kinase                                       |
|                  | SNP (synonymous)              | -           | KPN_RS17110                         | Cobalt-precorrin-2 C(20)-methyltransferase        |
|                  | SNP                           | K368R       | KPN_RS21675                         | Alpha-glucosidase                                 |
|                  | SNP                           | T102A       | KPN_RS05660                         | Molecular chaperone                               |
|                  | SNP                           | N58S        | KPN_RS05955                         | Transporter                                       |
| SNP              | Q140STOP<br>(normally 313 aa) | KPN_RS08600 | DNA binding protein                 |                                                   |
| SNP (synonymous) | -                             | KPN_RS08515 | D-mannonate oxidoreductase          |                                                   |
| <i>fusA</i>      | SNP                           | R309C       | KPN_RS20135                         | Elongation factor G                               |
|                  | SNP                           | V263A       | KPN_RS20465                         | Transcriptional regulator                         |
|                  | SNP                           | I322V       | KPN_RS20520                         | 1,4-alpha-glucan-branching protein                |
|                  | SNP                           | P251S       | KPN_RS20535                         | Gluconate transporter                             |
|                  | SNP                           | N164D       | KPN_RS20545                         | Transcriptional regulator                         |
|                  | SNP (synonymous)              | -           | KPN_RS15195                         | Phosphatase                                       |
|                  | SNP                           | Y1096C      | KPN_RS15460                         | Phosphoribosylformylglycinamide synthase          |

|            |         |                                     |             |                               |
|------------|---------|-------------------------------------|-------------|-------------------------------|
|            | SNP     | S69G                                | KPN_RS15390 | Membrane protein              |
|            | Del (G) | Truncation to 31aa (normally 212aa) | KPN_RS06250 | Leucine efflux protein        |
|            | Del (C) | Truncation to 74aa (normally 357aa) | KPN_RS17010 | Hypothetical protein          |
| <i>wza</i> | Del (G) | Truncation to 92aa (normally 377aa) | KPN_RS13510 | Polysaccharide export protein |

---
